# Supplementary material for: Analysis of the Composition of Different Instars of Tenebrio molitor Larvae using Near-Infrared Reflectance Spectroscopy for Prediction of Amino and Fatty Acid Content
Source: MDPI journal article supplement (doi:10.3390/insects14040310), 2023-03-23
Supplement: s1 [file s1]

## Supplementary material

# Analysis of the Composition of Different Instars of *Tenebrio molitor* Larvae using Near-Infrared Reflectance Spectroscopy for Prediction of Amino and Fatty Acid Content

Nina Kröncke <sup>1,\*</sup>, Stefan Wittke <sup>2</sup>, Nico Steinmann <sup>2</sup> and Rainer Benning <sup>1</sup>

<sup>1</sup> Institute of Food Technology and Bioprocess Engineering, University of Applied Sciences Bremerhaven, An der Karlstadt 8, 27568 Bremerhaven, Germany; rbenning@hs-bremerhaven.de

<sup>2</sup> Laboratory for (Marine) Biotechnology, University of Applied Sciences Bremerhaven, An der Karlstadt 8, 27568 Bremerhaven, Germany; swittke@hs-bremerhaven.de (S.W.); nsteinmann@studenten.hs-bremerhaven.de (N.S.)

**Table S1.** Amino acid content of *Tenebrio molitor* larvae of different larval instars (5 to 20) on a dry matter (DM) basis (%) analyzed by HPLC with OPA derivatization. Data are presented as mean  $\pm$  standard deviation,  $n = 4$ .

| Amino acid<br>(% DM) | Larvae instars                |                               |                               |                               |                                |                               |                               |                               |
|----------------------|-------------------------------|-------------------------------|-------------------------------|-------------------------------|--------------------------------|-------------------------------|-------------------------------|-------------------------------|
|                      | 5-6                           | 7-8                           | 9-10                          | 11-12                         | 13-14                          | 15-16                         | 17-18                         | 19-20                         |
| Ala                  | 11.82 $\pm$ 0.17 <sup>a</sup> | 11.58 $\pm$ 0.14 <sup>a</sup> | 11.54 $\pm$ 0.08 <sup>a</sup> | 11.36 $\pm$ 0.01 <sup>a</sup> | 10.43 $\pm$ 1.84 <sup>ab</sup> | 8.99 $\pm$ 0.05 <sup>b</sup>  | 8.97 $\pm$ 0.17 <sup>b</sup>  | 8.74 $\pm$ 0.19 <sup>b</sup>  |
| Arg                  | 4.74 $\pm$ 0.03 <sup>c</sup>  | 4.63 $\pm$ 0.03 <sup>c</sup>  | 4.67 $\pm$ 0.09 <sup>c</sup>  | 4.92 $\pm$ 0.03 <sup>bc</sup> | 5.57 $\pm$ 1.12 <sup>ab</sup>  | 6.00 $\pm$ 0.17 <sup>a</sup>  | 6.16 $\pm$ 0.07 <sup>a</sup>  | 5.95 $\pm$ 0.08 <sup>a</sup>  |
| Asp                  | 8.20 $\pm$ 0.00 <sup>b</sup>  | 7.95 $\pm$ 0.04 <sup>b</sup>  | 7.82 $\pm$ 0.06 <sup>b</sup>  | 7.92 $\pm$ 0.07 <sup>b</sup>  | 8.49 $\pm$ 0.69 <sup>a</sup>   | 9.04 $\pm$ 0.22 <sup>a</sup>  | 8.90 $\pm$ 0.22 <sup>a</sup>  | 8.62 $\pm$ 0.04 <sup>a</sup>  |
| Glu                  | 17.16 $\pm$ 0.06 <sup>c</sup> | 17.24 $\pm$ 0.10 <sup>c</sup> | 17.94 $\pm$ 0.16 <sup>b</sup> | 17.49 $\pm$ 0.11 <sup>c</sup> | 18.01 $\pm$ 2.51 <sup>ab</sup> | 19.49 $\pm$ 0.02 <sup>a</sup> | 18.76 $\pm$ 0.10 <sup>b</sup> | 18.60 $\pm$ 0.60 <sup>b</sup> |
| Gly                  | 9.69 $\pm$ 0.10 <sup>a</sup>  | 9.33 $\pm$ 0.31 <sup>ab</sup> | 8.91 $\pm$ 0.24 <sup>b</sup>  | 8.51 $\pm$ 0.03 <sup>c</sup>  | 7.28 $\pm$ 1.88 <sup>d</sup>   | 5.91 $\pm$ 0.04 <sup>e</sup>  | 5.85 $\pm$ 0.03 <sup>e</sup>  | 5.77 $\pm$ 0.14 <sup>e</sup>  |
| His                  | 2.59 $\pm$ 0.03 <sup>b</sup>  | 2.59 $\pm$ 0.01 <sup>b</sup>  | 2.57 $\pm$ 0.02 <sup>b</sup>  | 2.57 $\pm$ 0.00 <sup>b</sup>  | 2.97 $\pm$ 0.58 <sup>ab</sup>  | 3.42 $\pm$ 0.01 <sup>a</sup>  | 3.37 $\pm$ 0.02 <sup>a</sup>  | 3.38 $\pm$ 0.04 <sup>a</sup>  |
| Ile                  | 4.53 $\pm$ 0.01 <sup>a</sup>  | 4.44 $\pm$ 0.03 <sup>a</sup>  | 4.31 $\pm$ 0.01 <sup>a</sup>  | 4.34 $\pm$ 0.02 <sup>a</sup>  | 4.58 $\pm$ 0.20 <sup>a</sup>   | 4.78 $\pm$ 0.09 <sup>a</sup>  | 4.80 $\pm$ 0.03 <sup>a</sup>  | 4.52 $\pm$ 0.03 <sup>a</sup>  |
| Leu                  | 7.86 $\pm$ 0.05 <sup>a</sup>  | 7.70 $\pm$ 0.03 <sup>a</sup>  | 7.57 $\pm$ 0.02 <sup>a</sup>  | 7.62 $\pm$ 0.01 <sup>a</sup>  | 7.83 $\pm$ 0.36 <sup>a</sup>   | 8.14 $\pm$ 0.15 <sup>a</sup>  | 8.14 $\pm$ 0.06 <sup>a</sup>  | 7.88 $\pm$ 0.03 <sup>a</sup>  |
| Lys                  | 8.27 $\pm$ 0.63 <sup>c</sup>  | 9.51 $\pm$ 0.23 <sup>b</sup>  | 9.77 $\pm$ 0.15 <sup>b</sup>  | 10.23 $\pm$ 0.01 <sup>a</sup> | 8.06 $\pm$ 0.34 <sup>c</sup>   | 6.39 $\pm$ 0.54 <sup>d</sup>  | 7.33 $\pm$ 0.29 <sup>c</sup>  | 8.09 $\pm$ 0.96 <sup>c</sup>  |
| Phe                  | 3.02 $\pm$ 0.00 <sup>b</sup>  | 2.96 $\pm$ 0.11 <sup>b</sup>  | 2.94 $\pm$ 0.01 <sup>b</sup>  | 3.00 $\pm$ 0.01 <sup>b</sup>  | 3.44 $\pm$ 0.66 <sup>ab</sup>  | 3.96 $\pm$ 0.06 <sup>a</sup>  | 3.99 $\pm$ 0.08 <sup>a</sup>  | 4.02 $\pm$ 0.06 <sup>a</sup>  |
| Ser                  | 6.00 $\pm$ 0.04 <sup>a</sup>  | 5.85 $\pm$ 0.14 <sup>ab</sup> | 5.75 $\pm$ 0.11 <sup>b</sup>  | 5.67 $\pm$ 0.01 <sup>b</sup>  | 5.48 $\pm$ 0.23 <sup>bc</sup>  | 5.19 $\pm$ 0.09 <sup>c</sup>  | 5.10 $\pm$ 0.03 <sup>c</sup>  | 5.14 $\pm$ 0.07 <sup>c</sup>  |
| Thr                  | 5.14 $\pm$ 0.00 <sup>a</sup>  | 5.00 $\pm$ 0.06 <sup>a</sup>  | 4.98 $\pm$ 0.03 <sup>a</sup>  | 5.00 $\pm$ 0.01 <sup>a</sup>  | 4.95 $\pm$ 0.17 <sup>ab</sup>  | 4.81 $\pm$ 0.05 <sup>b</sup>  | 4.73 $\pm$ 0.07 <sup>b</sup>  | 4.62 $\pm$ 0.03 <sup>c</sup>  |
| Tyr                  | 4.02 $\pm$ 0.08 <sup>c</sup>  | 4.31 $\pm$ 0.33 <sup>bc</sup> | 4.51 $\pm$ 0.00 <sup>b</sup>  | 4.63 $\pm$ 0.09 <sup>b</sup>  | 6.01 $\pm$ 1.47 <sup>a</sup>   | 7.01 $\pm$ 0.15 <sup>a</sup>  | 7.01 $\pm$ 0.15 <sup>a</sup>  | 7.98 $\pm$ 0.12 <sup>a</sup>  |
| Val                  | 6.95 $\pm$ 0.05 <sup>a</sup>  | 6.91 $\pm$ 0.01 <sup>a</sup>  | 6.72 $\pm$ 0.02 <sup>a</sup>  | 6.73 $\pm$ 0.08 <sup>a</sup>  | 6.91 $\pm$ 0.13 <sup>a</sup>   | 6.87 $\pm$ 0.10 <sup>a</sup>  | 6.89 $\pm$ 0.01 <sup>a</sup>  | 6.69 $\pm$ 0.03 <sup>a</sup>  |
| Total EAA            | 47.12 $\pm$ 0.09 <sup>d</sup> | 48.05 $\pm$ 0.11 <sup>d</sup> | 48.04 $\pm$ 0.07 <sup>d</sup> | 49.04 $\pm$ 0.04 <sup>c</sup> | 50.31 $\pm$ 1.09 <sup>bc</sup> | 51.39 $\pm$ 0.12 <sup>b</sup> | 52.42 $\pm$ 0.09 <sup>a</sup> | 53.13 $\pm$ 0.17 <sup>a</sup> |

<sup>a-e</sup> Different superscripts in the same row denote significant differences ( $p < 0.05$ ); Ala: alanine; Arg: arginine; Asp: aspartic acid; Glu: glutamic acid; Gly: glycine; His: histidine; Ile: isoleucine; Leu: leucine; Lys: lysine; Phe: phenylalanine; Ser: serine; Thr: threonine; Tyr: tyrosine; Val: valine, Total EAA: total essential amino acids.

**Table S2.** Fatty acid composition of *Tenebrio molitor* larvae of different larval instars (5 to 20) on a dry matter (DM) basis (relative % of total fatty acids) analyzed by GC-FID. Data are presented as mean  $\pm$  standard deviation,  $n = 4$ .

| Fatty acid<br>(% DM)        | Larvae instars                |                               |                               |                               |                               |                               |                               |                               |
|-----------------------------|-------------------------------|-------------------------------|-------------------------------|-------------------------------|-------------------------------|-------------------------------|-------------------------------|-------------------------------|
|                             | 5-6                           | 7-8                           | 9-10                          | 11-12                         | 13-14                         | 15-16                         | 17-18                         | 19-20                         |
| Myristic acid<br>(C14:0)    | 2.27 $\pm$ 0.13 <sup>e</sup>  | 2.81 $\pm$ 0.16 <sup>d</sup>  | 3.16 $\pm$ 0.26 <sup>c</sup>  | 3.21 $\pm$ 0.15 <sup>c</sup>  | 3.56 $\pm$ 0.08 <sup>b</sup>  | 3.41 $\pm$ 0.06 <sup>bc</sup> | 3.37 $\pm$ 0.09 <sup>c</sup>  | 4.16 $\pm$ 0.05 <sup>a</sup>  |
| Palmitic acid<br>(C16:0)    | 18.45 $\pm$ 0.26 <sup>a</sup> | 18.44 $\pm$ 0.44 <sup>a</sup> | 18.75 $\pm$ 0.64 <sup>a</sup> | 18.91 $\pm$ 0.68 <sup>a</sup> | 19.51 $\pm$ 0.31 <sup>a</sup> | 19.40 $\pm$ 0.22 <sup>a</sup> | 19.06 $\pm$ 0.31 <sup>a</sup> | 18.68 $\pm$ 0.81 <sup>a</sup> |
| Palmitoleic acid<br>(C16:1) | 1.33 $\pm$ 0.00 <sup>c</sup>  | 1.53 $\pm$ 0.01 <sup>b</sup>  | 1.29 $\pm$ 0.13 <sup>c</sup>  | 1.16 $\pm$ 0.12 <sup>c</sup>  | 1.25 $\pm$ 0.04 <sup>c</sup>  | 1.25 $\pm$ 0.09 <sup>c</sup>  | 1.32 $\pm$ 0.04 <sup>c</sup>  | 1.74 $\pm$ 0.05 <sup>a</sup>  |

|                                 |                           |                           |                           |                           |                           |                           |                           |                           |
|---------------------------------|---------------------------|---------------------------|---------------------------|---------------------------|---------------------------|---------------------------|---------------------------|---------------------------|
| Stearic acid<br>(C18:0)         | 6.02 ± 0.07 <sup>a</sup>  | 4.51 ± 0.44 <sup>b</sup>  | 4.48 ± 0.17 <sup>b</sup>  | 4.23 ± 0.43 <sup>b</sup>  | 4.04 ± 0.13 <sup>b</sup>  | 4.01 ± 0.14 <sup>b</sup>  | 3.82 ± 0.07 <sup>b</sup>  | 2.85 ± 0.03 <sup>c</sup>  |
| Oleic acid<br>(C18:1 n-9)       | 33.57 ± 0.14 <sup>a</sup> | 34.01 ± 0.61 <sup>a</sup> | 33.46 ± 1.09 <sup>a</sup> | 31.66 ± 0.56 <sup>a</sup> | 32.57 ± 0.07 <sup>a</sup> | 33.21 ± 0.17 <sup>a</sup> | 33.97 ± 0.42 <sup>a</sup> | 34.44 ± 0.45 <sup>a</sup> |
| Linoleic acid<br>(C18:2 n-6)    | 37.84 ± 0.05 <sup>a</sup> | 37.88 ± 1.08 <sup>a</sup> | 37.89 ± 1.56 <sup>a</sup> | 39.68 ± 0.22 <sup>a</sup> | 37.98 ± 0.26 <sup>a</sup> | 37.64 ± 0.39 <sup>a</sup> | 37.31 ± 0.38 <sup>a</sup> | 36.91 ± 0.40 <sup>a</sup> |
| α-Linolenic acid<br>(C18:3 n-3) | 0.53 ± 0.03 <sup>c</sup>  | 0.83 ± 0.20 <sup>bc</sup> | 0.97 ± 0.02 <sup>b</sup>  | 1.14 ± 0.11 <sup>ab</sup> | 1.09 ± 0.03 <sup>ab</sup> | 1.09 ± 0.04 <sup>ab</sup> | 1.14 ± 0.05 <sup>ab</sup> | 1.23 ± 0.03 <sup>a</sup>  |
| Σ SFA                           | 26.73 ± 0.45              | 25.76 ± 1.04              | 26.39 ± 1.08              | 26.36 ± 1.26              | 27.11 ± 0.51              | 26.82 ± 0.42              | 26.25 ± 0.47              | 25.68 ± 0.89              |
| Σ MUFA                          | 34.90 ± 0.15              | 35.54 ± 0.62              | 34.75 ± 1.23              | 32.82 ± 0.68              | 33.82 ± 0.11              | 34.46 ± 0.26              | 35.29 ± 0.47              | 36.18 ± 0.50              |
| Σ PUFA                          | 38.37 ± 0.08              | 38.71 ± 1.28              | 38.86 ± 1.58              | 40.82 ± 0.33              | 39.07 ± 0.29              | 38.72 ± 0.43              | 38.46 ± 0.44              | 38.14 ± 0.42              |

<sup>a-e</sup> Different superscripts in the same row denote significant differences ( $p < 0.05$ ), SFA: saturated fatty acids, MUFA: monounsaturated fatty acids, PUFA: polyunsaturated fatty acids.

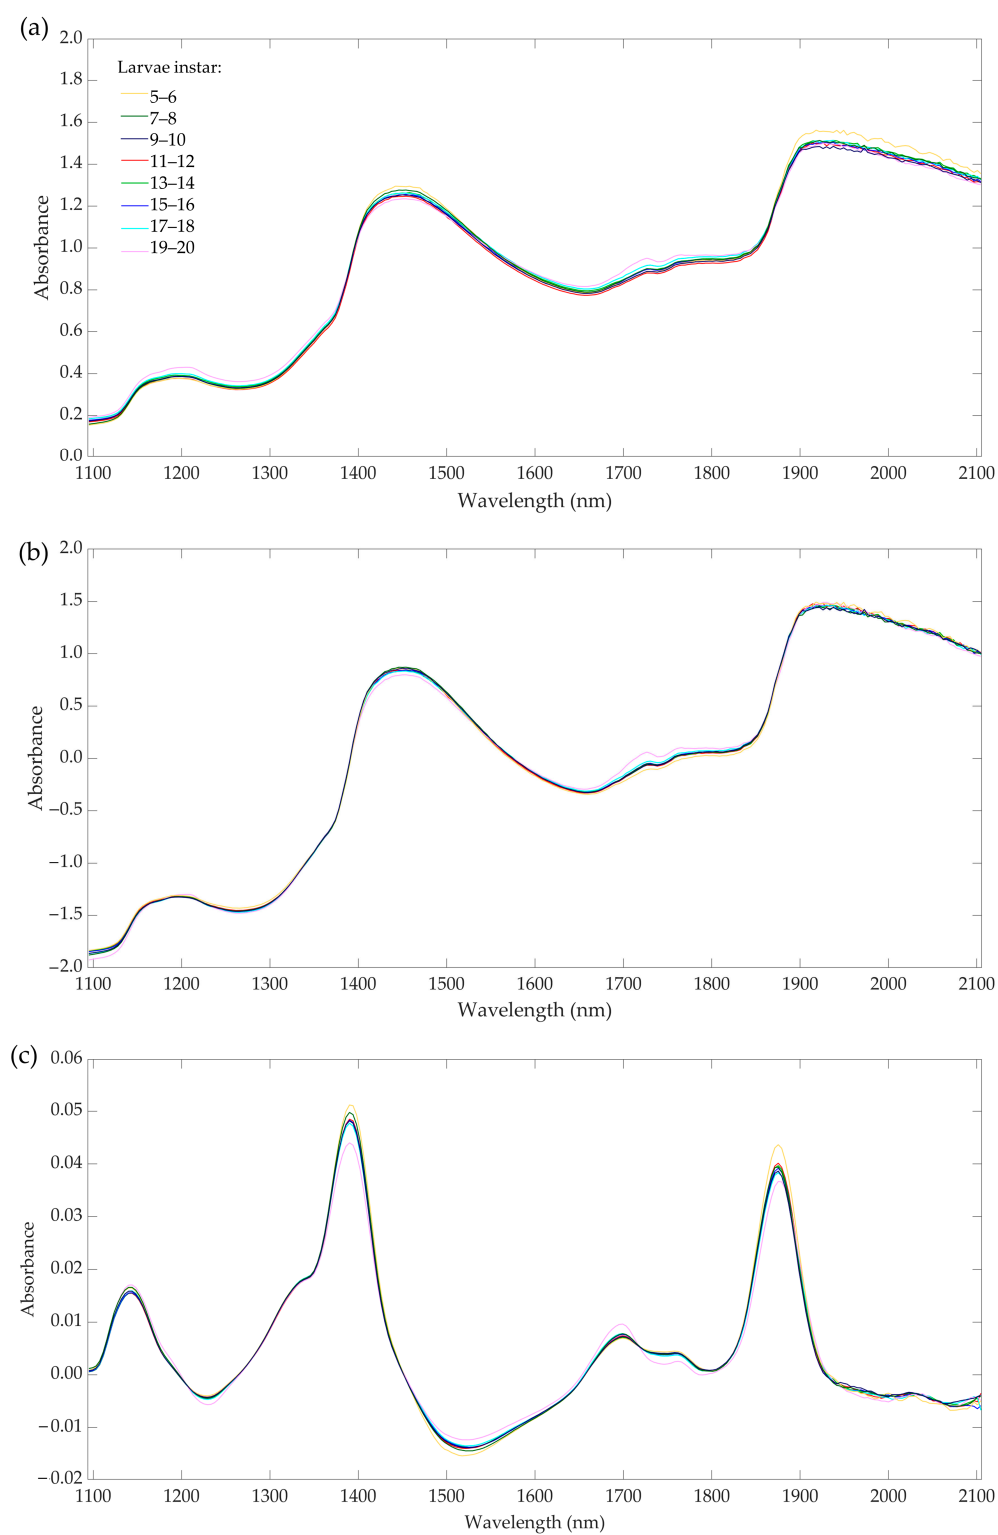

**Figure S1.** Mean average NIR raw spectra (a) and preprocessed spectra with standard normal variate (b) and first derivative (c) of living *Tenebrio molitor* larvae with different instars 5 to 20 ( $n = 10$ ).
